# Supplementary material
Source: PubMed Central journal article supplement (PMC9881678)
Supplement: NIHMS1818326-supplement-1.pdf [file NIHMS1818326-supplement-1.pdf]

**Supplemental Table 1***Path Estimates for Model B*

| <i>Direct Effects</i>                                           | <i>Estimate</i> | <i>S.E.</i> | <i>p</i> |
|-----------------------------------------------------------------|-----------------|-------------|----------|
| EN Reading Comprehension ( $R^2 = .84$ ) regressed on:          |                 |             |          |
| EN Morphological Awareness                                      | .19             | .08         | .017     |
| EN Word Reading                                                 | .50             | .10         | <.001    |
| EN Vocabulary                                                   | .13             | .08         | .129     |
| SP Word Reading                                                 | -.07            | .11         | .549     |
| SP Reading Comprehension                                        | .25             | .12         | .037     |
| Grade                                                           | -.00            | .07         | .958     |
| EN Word Reading ( $R^2 = .80$ ) regressed on:                   |                 |             |          |
| EN Morphological Awareness                                      | .25             | .09         | .003     |
| Phonological Awareness                                          | .57             | .08         | <.001    |
| SP Morphological Awareness                                      | .05             | .09         | .571     |
| Grade                                                           | .13             | .07         | .041     |
| SP Reading Comprehension ( $R^2 = .88$ ) regressed on:          |                 |             |          |
| SP Morphological Awareness                                      | .04             | .07         | .580     |
| SP Word Reading                                                 | .51             | .08         | <.001    |
| SP Vocabulary                                                   | .27             | .08         | .001     |
| EN Word Reading                                                 | .24             | .08         | .002     |
| Grade                                                           | -.05            | .06         | .415     |
| SP Word Reading ( $R^2 = .69$ ) regressed on:                   |                 |             |          |
| SP Morphological Awareness                                      | .42             | .10         | <.001    |
| Phonological Awareness                                          | .44             | .09         | <.001    |
| EN Morphological Awareness                                      | -.08            | .11         | .474     |
| Grade                                                           | .14             | .09         | .105     |
| <i>Significant Indirect Effects</i>                             | <i>Estimate</i> | <i>S.E.</i> | <i>p</i> |
| EN Morphological Awareness to EN Reading Comprehension through: |                 |             |          |
| EN Word Reading                                                 | 0.13            | 0.05        | 0.010    |
| SP Morphological Awareness to SP Reading Comprehension through: |                 |             |          |
| SP Word Reading                                                 | 0.21            | 0.06        | 0.001    |
| SP Vocabulary                                                   | 0.15            | 0.05        | 0.001    |
| EN Morphological Awareness to SP Reading Comprehension through: |                 |             |          |
| EN Word Reading                                                 | 0.06            | 0.03        | 0.032    |

*Note.* All other indirect paths not included above do not reach statistical significance.
